# Supplementary material for: IL-17 Pathway Members as Potential Biomarkers of Effective Systemic Treatment and Cardiovascular Disease in Patients with Moderate-to-Severe Psoriasis
Source: MDPI journal article supplement (doi:10.3390/ijms23010555), 2022-01-05
Supplement: s1 [file s1]

**Supplementary Table S1.** Characteristics of patients (n=30) grouped by type of systemic anti-psoriatic treatment.

|                                       | <b>Methotrexate<br/>(n=11)</b> | <b>Adalimumab<br/>(n=8)</b> | <b>Secukinumab<br/>(n=6)</b> | <b>Ustekinumab<br/>(n=5)</b> |
|---------------------------------------|--------------------------------|-----------------------------|------------------------------|------------------------------|
| Age, years                            | 61.0 (58.5-64.0)               | 60.5 (57.5-63.3)            | 59.5 (55.0-70.0)             | 64.0 (58.0-66.0)             |
| Sex, male, n (%)                      | 6 (54.5)                       | 6 (75.0)                    | 3 (50.0)                     | 3 (60.0)                     |
| PASI                                  | 1.2 (0.3-1.8)                  | 0.9 (0.0-2.0)               | 0 (0.0-0.9)                  | 0 (0.0-0.6)                  |
| BMI (kg/m <sup>2</sup> )              | 31.4 (28.6-32.7)               | 34.9 (29.6-38.3)            | 29.5 (27.9-35.5)             | 30.0 (27.9-30.8)             |
| Medically treated diabetes, n (%)     | 6 (54.5)                       | 4 (50.0)                    | 1 (16.7)                     | 1 (20.0)                     |
| PsA verified by rheumatologist, n (%) | 5 (45.5)                       | 2 (25.0)                    | 4 (66.7)                     | 0 (0)                        |

Data are reported as median (IQR) for continuous variables. PASI, psoriasis area and severity index; BMI, body mass index; PsA, psoriatic arthritis.

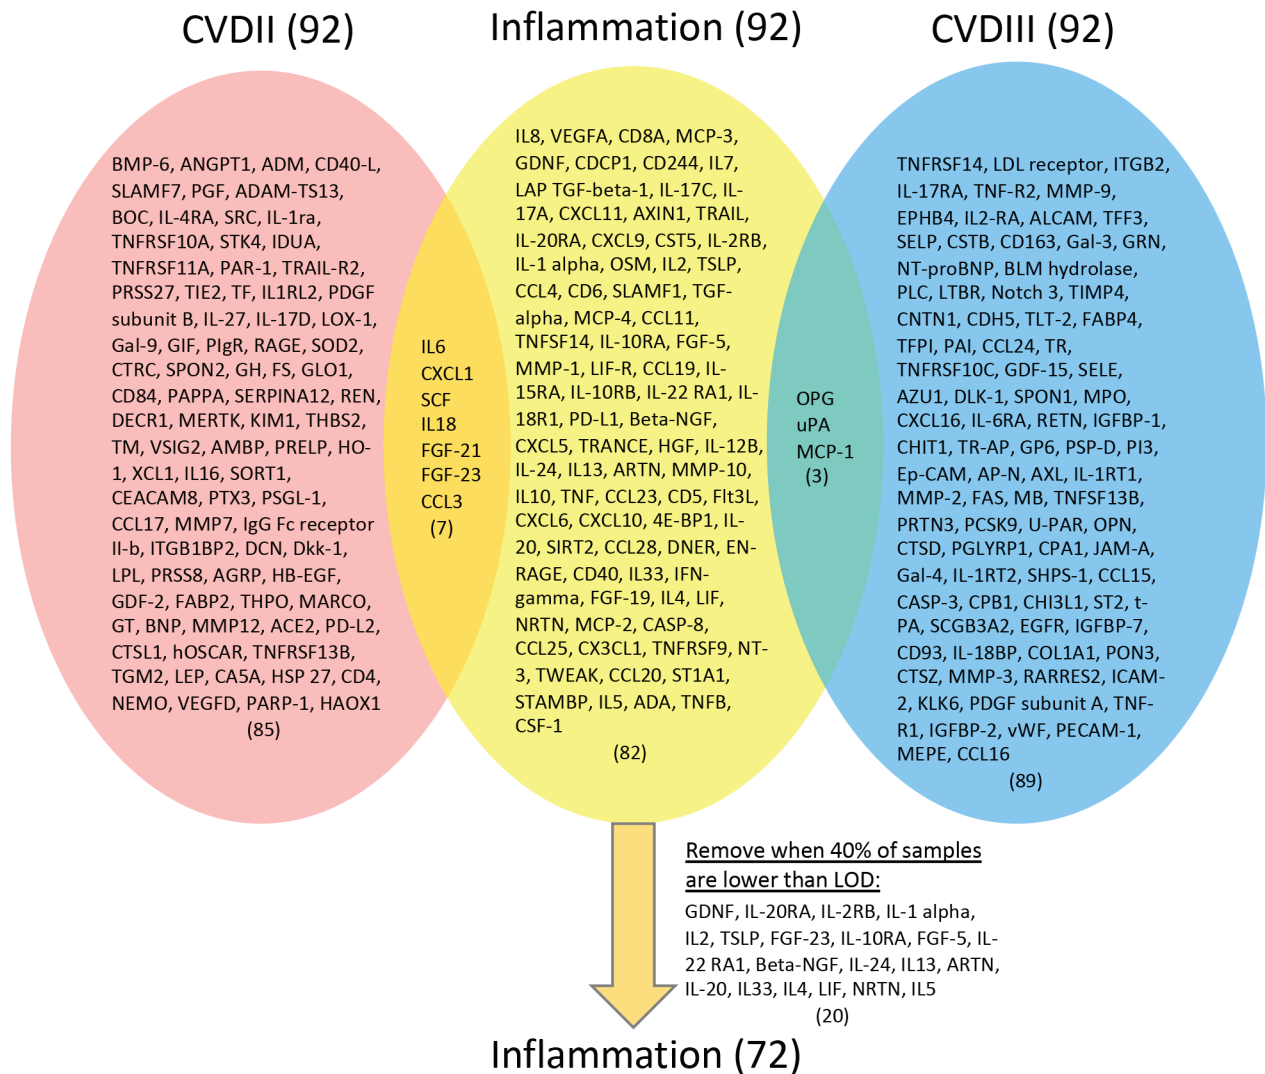

Supplementary Figure S1. Olink CVDII, CVDIII and Inflammation protein panels.

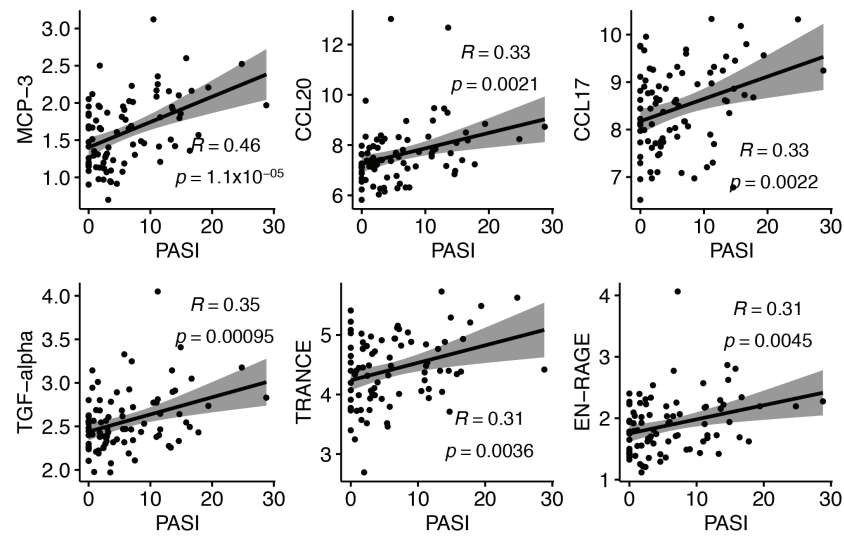

**Supplementary Figure S2. Pearson correlation scatter plots between selected differentially expressed proteins and PASI for all patients (n=84).**

Pearson correlation coefficients R are shown with associated p-values, and y-axis shows protein NPX values.

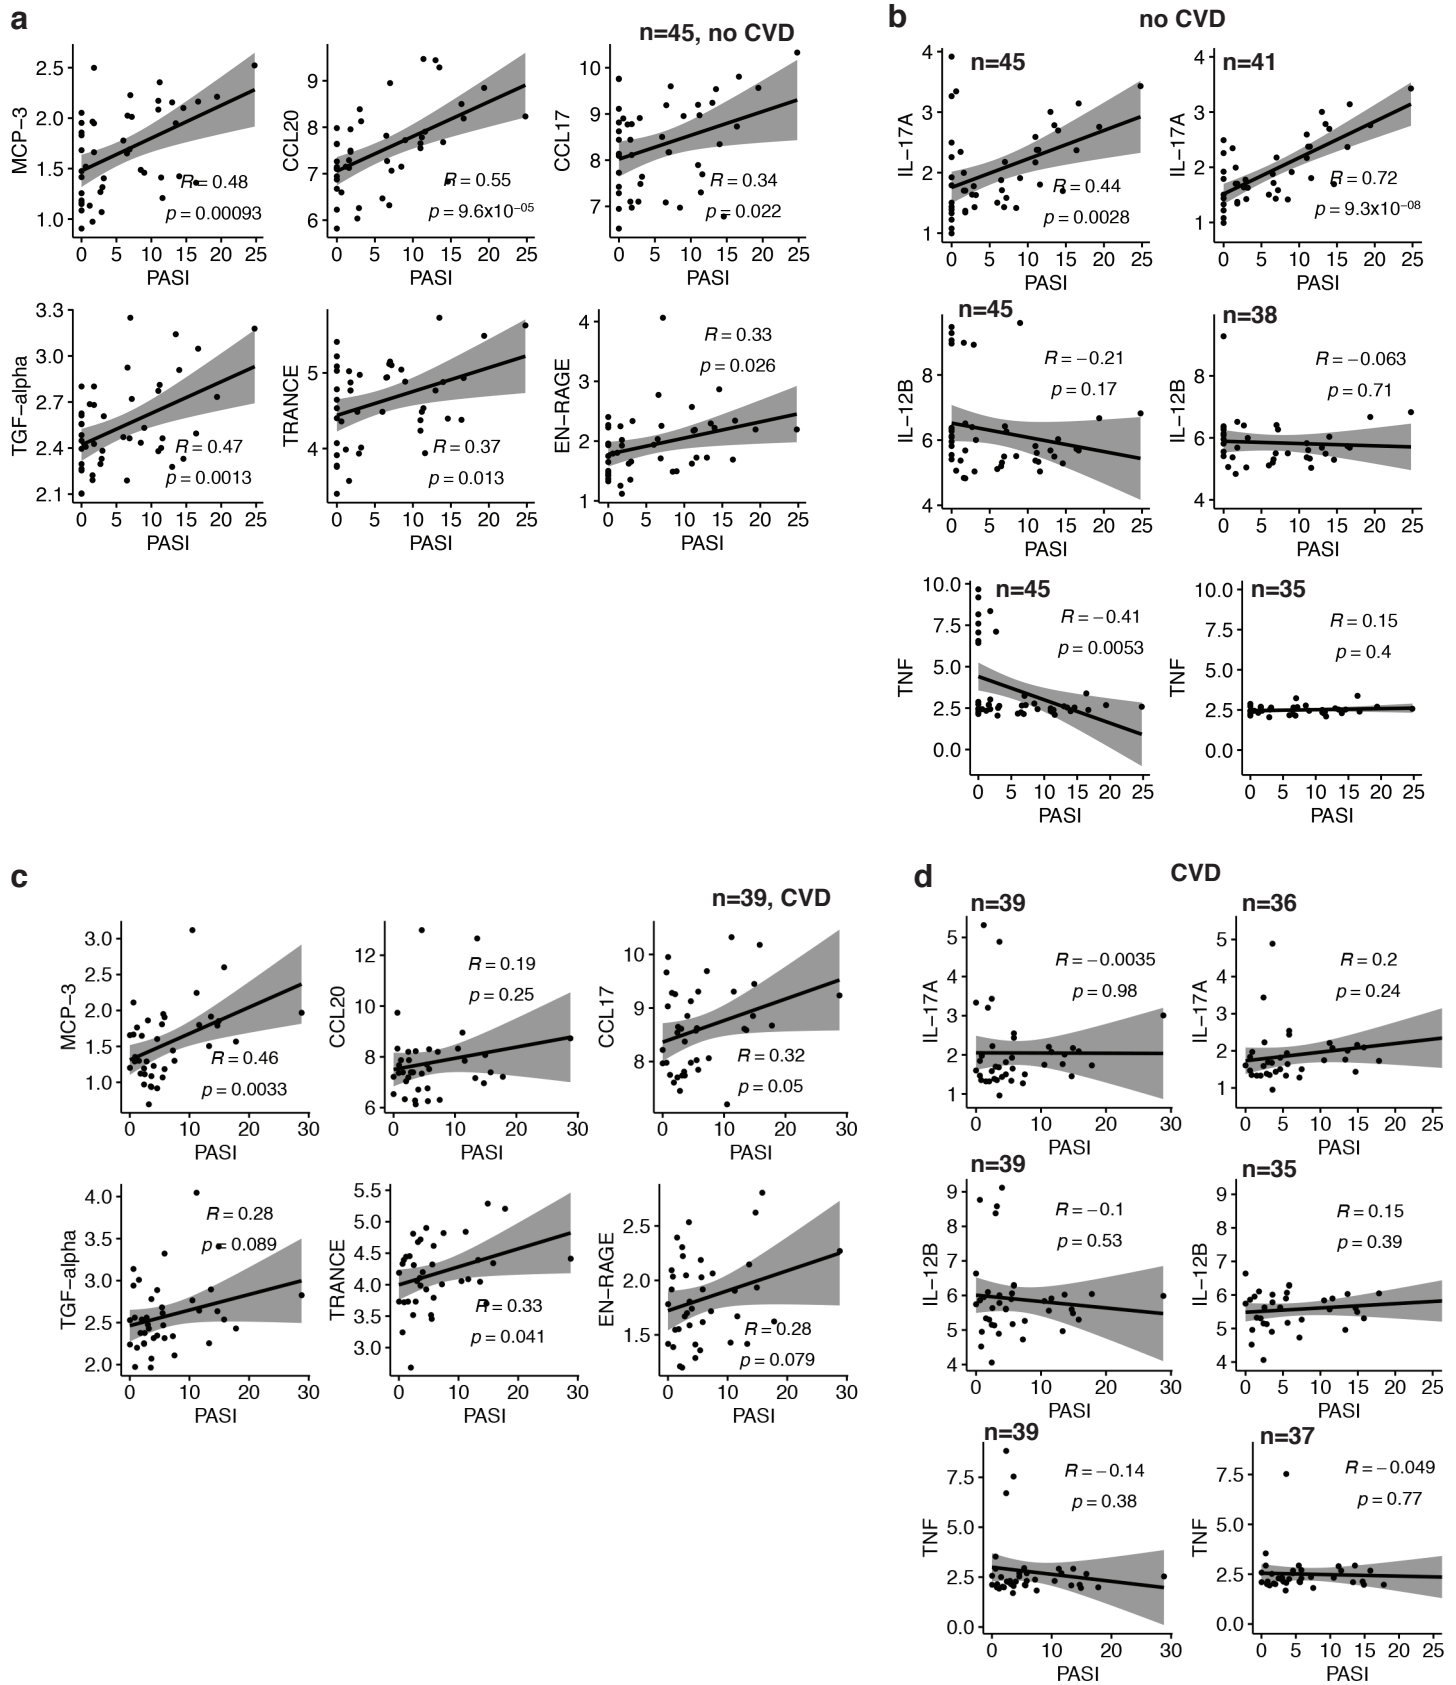

**Supplementary Figure S3. Pearson correlation scatter plots between selected differentially expressed proteins and PASI.**

Pearson correlation coefficients  $R$  are shown with associated  $p$ -values, and y-axis shows protein NPX values for **a**. Patients without CVD ( $n=45$ ). **b**. Patients without CVD ( $n=45$ , left panel) compared to adjusted groups after exclusion of patients receiving anti-IL-17A ( $n=4$ ), anti-IL-12/23 ( $n=7$ ) and anti-TNF ( $n=10$ ), respectively (right panel). **c**. Patients with CVD ( $n=39$ ). **d**. Patients with CVD ( $n=39$ , left panel) compared to adjusted groups after exclusion of patients receiving anti-IL-17A ( $n=3$ ), anti-IL-12/23 ( $n=4$ ) and anti-TNF ( $n=2$ ), respectively (right panel).
